# Supplementary material for: Similarity in filter properties related to similarity in filter output-connection patterns: analysis using convolutional neural networks
Source: Research Square preprint supplement (doi:10.21203/rs.3.rs-6720117/v1), 2025-09-02
Supplement: Supplementary file 1 [file 187a4c47a9caa9ad3b6cf802.docx]

**Supplementary Figure**

**Similarity in filter properties related to similarity in filter output-connection patterns: analysis using convolutional neural networks**

**Hiroshi Tamura1, 2***

1Graduate School of Frontier Biosciences, The University of Osaka, Suita, Osaka 565-0871, Japan

2Center for Information and Neural Networks, Suita, Osaka 565-0871, Japan

**
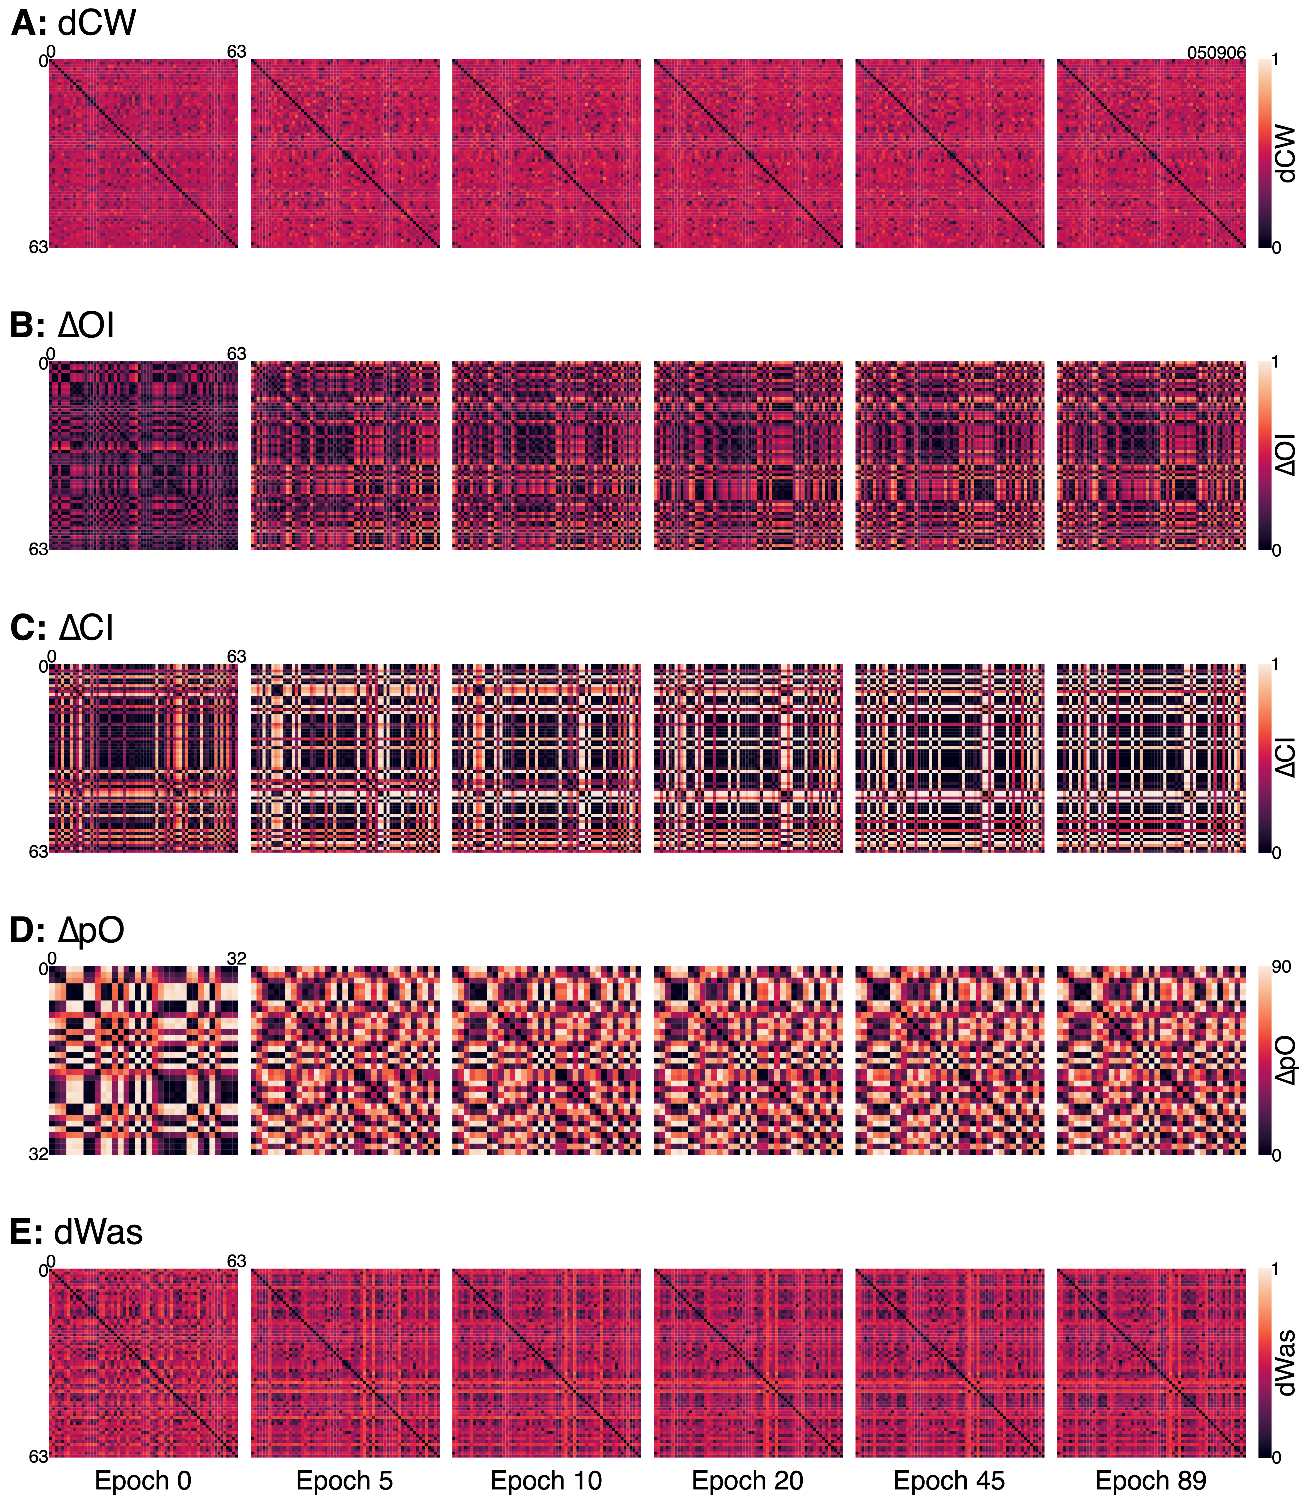
**

**Supplementary Figure 1.** Matrices of connection weight distance (dCW, **A**), absolute difference in orientation index (𝛥OI, **B**), absolute difference in color index (𝛥CI, **C**), absolute difference in preferred orientation (𝛥pO, **D**), and distance in amplitude spectrum of filter weights (dWas, **E**) at epochs 0, 5, 10, 20, 45, and 89 of filters in the first convolutional layer (conv1) of a representative model instance of a convolutional neural network (AlexNet). The matrices are color coded. Analysis of 𝛥pO was limited to orientation-selective conv1 filters (OI ≥ 0.5, n = 33) at the final epoch (epoch 89). The remaining analyses used all 64 conv1 filters.
